# Supplementary material for: Bidirectional Allosteric Coupling between PIP2 Binding and the Pore of the Oncochannel TRPV6
Source: MDPI journal article supplement (doi:10.3390/ijms25010618), 2024-01-03
Supplement: s1 [file s1]

**A**

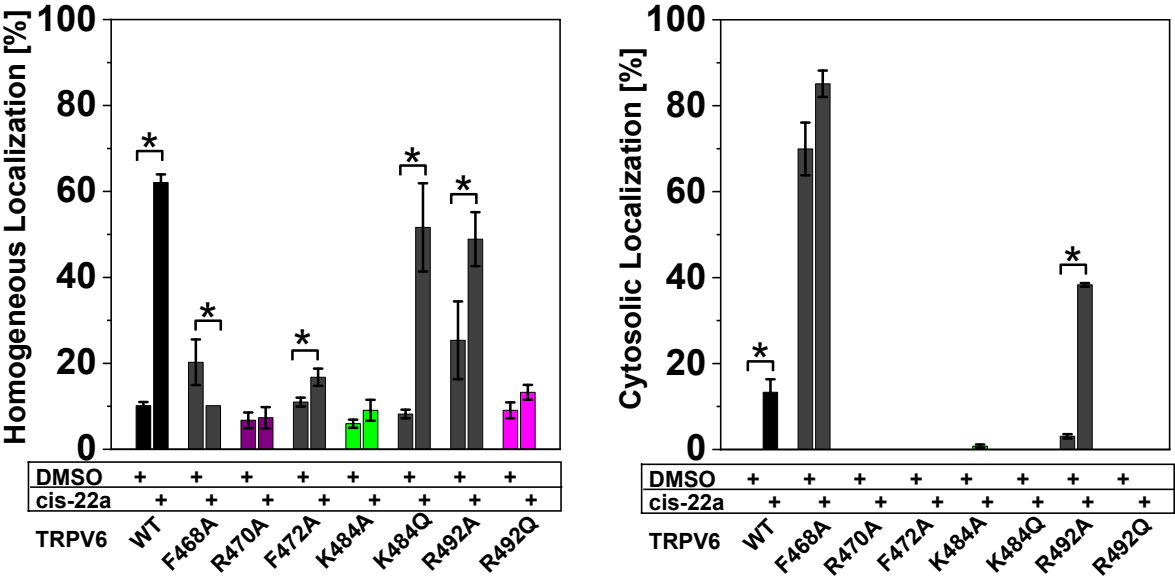

| TRPV6 | n <sub>DMSO</sub> | n <sub>cis-22a</sub> |
|-------|-------------------|----------------------|
| WT    | 588               | 610                  |
| F468A | 148               | 148                  |
| R470A | 283               | 341                  |
| F472A | 181               | 206                  |
| K484A | 230               | 225                  |
| K484Q | 180               | 198                  |
| R492A | 103               | 109                  |
| R492Q | 83                | 70                   |

**B**

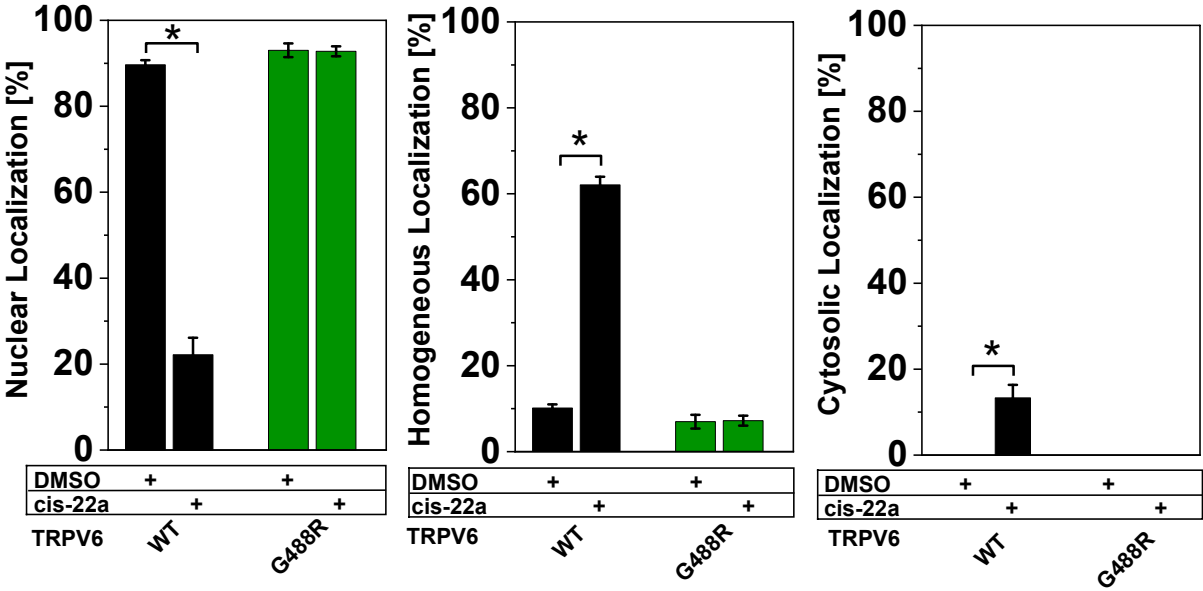

| TRPV6 | n <sub>DMSO</sub> | n <sub>cis-22a</sub> |
|-------|-------------------|----------------------|
| WT    | 274               | 203                  |
| G488R | 73                | 70                   |

Supplementary Figure S3
