# Supplementary material for: Bidirectional Allosteric Coupling between PIP2 Binding and the Pore of the Oncochannel TRPV6
Source: MDPI journal article supplement (doi:10.3390/ijms25010618), 2024-01-03

# Pal-PIP<sub>2</sub> Mmo(meas)=1659.0198

HK\_016 #28-41 RT: 0.12-0.18 AV: 14 NL: 4.37E8  
T: FTMS + c ESI Full ms [100.0000-1500.0000]

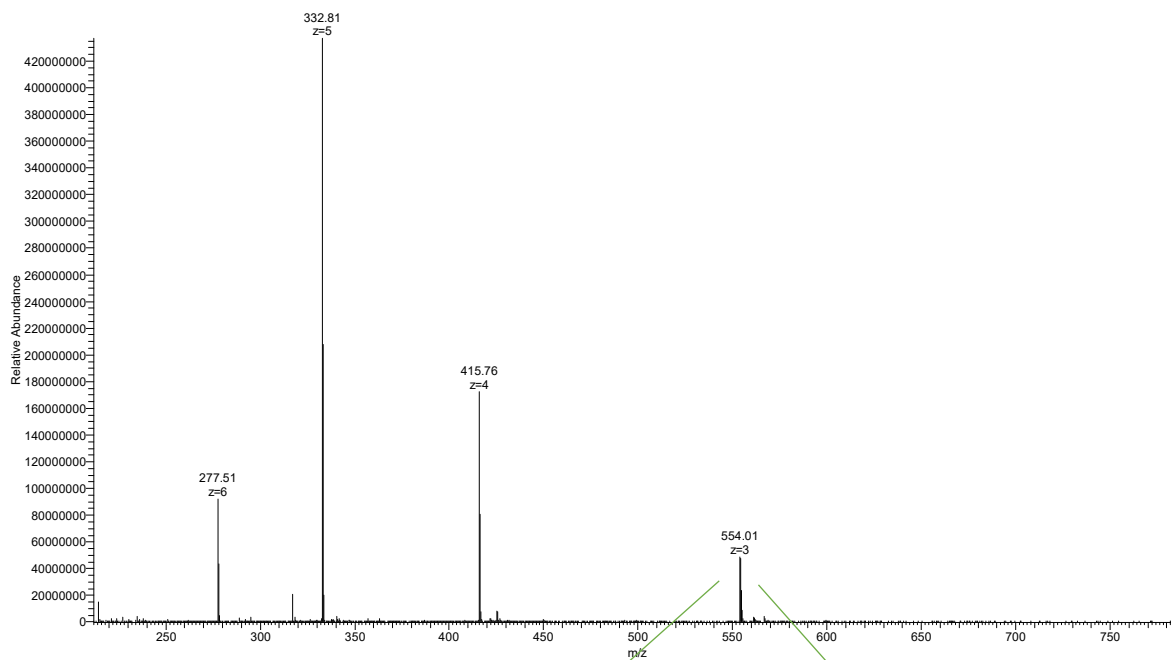

HK\_016 #28-41 RT: 0.12-0.18 AV: 14 NL: 4.82E7  
T: FTMS + c ESI Full ms [100.0000-1500.0000]

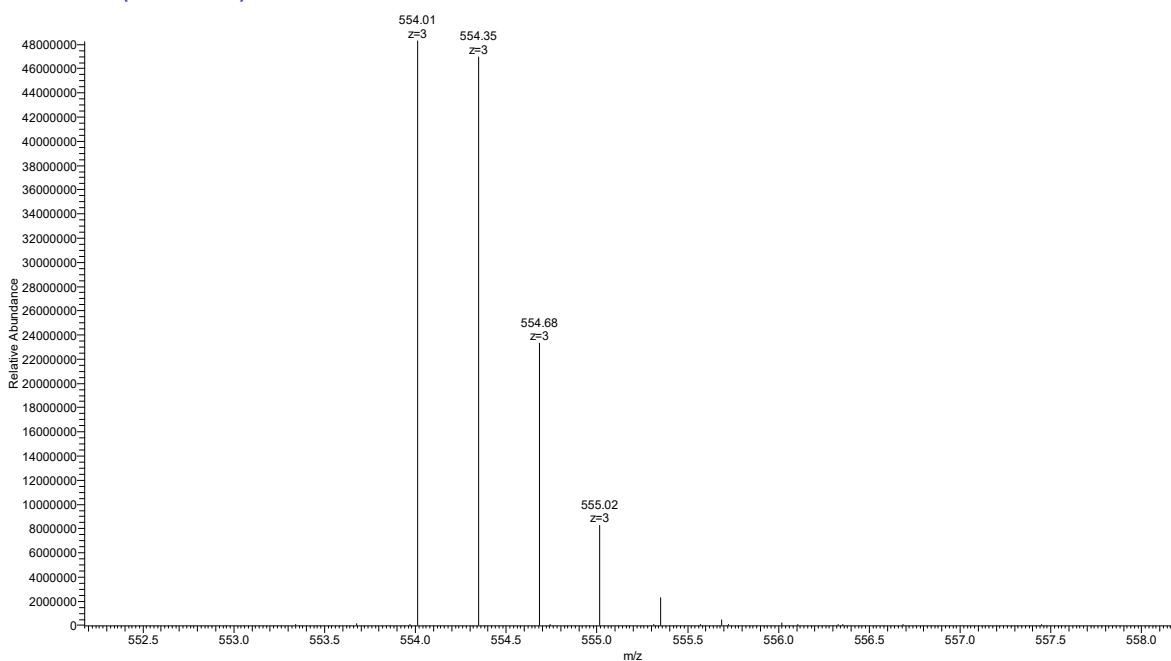

# Pal-AA-PIP<sub>2</sub> Mmo(meas)=1346.7700 (and its Na<sup>+</sup> adduct)

hk\_017 #27-41 RT: 0.12-0.18 AV: 15 NL: 3.19E8  
T: FTMS + c ESI Full ms [100.0000-1500.0000]

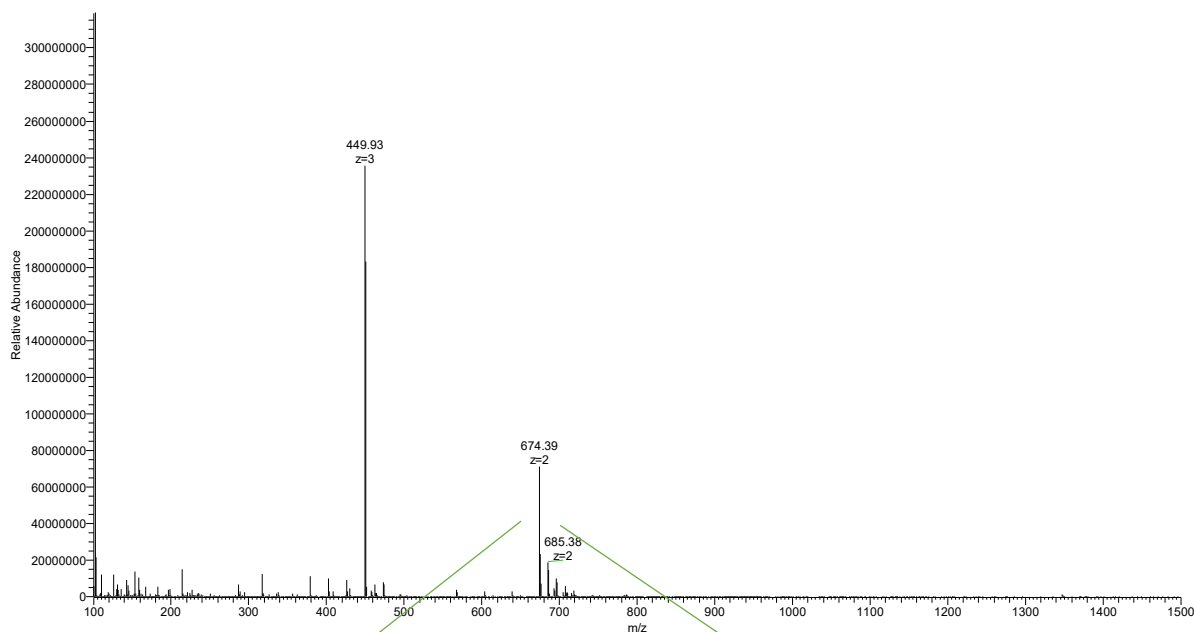

hk\_017 #27-41 RT: 0.12-0.18 AV: 15 NL: 7.08E7  
T: FTMS + c ESI Full ms [100.0000-1500.0000]

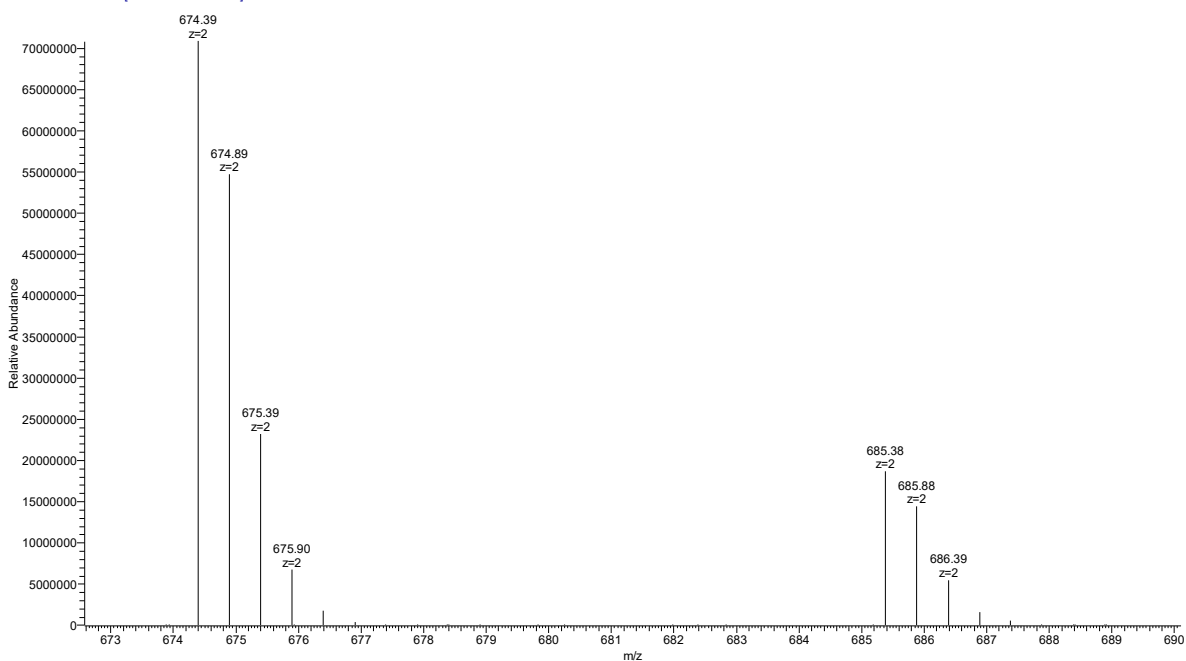

Supplement: s1 [file s1]
