# Supplementary material for: Bidirectional Allosteric Coupling between PIP2 Binding and the Pore of the Oncochannel TRPV6
Source: Int J Mol Sci. 2024 Jan 3;25(1):618. doi: 10.3390/ijms25010618 (PMC10779433; doi:10.3390/ijms25010618)
Supplement: Supplementary file 1 [file ijms-25-00618-s001.zip]

Archive with 9 entries (9 files):
- Figure S1.pdf
- Figure S2.pdf
- Figure S3.pdf
- Figure S4.pdf
- Figure S5.pdf
- Figure S6.pdf
- Figure S7.pdf
- Supplementary Figure Legends.pdf
- Supplementary Information.pdf
