# Supplementary figures and images for: Bidirectional Allosteric Coupling between PIP2 Binding and the Pore of the Oncochannel TRPV6
Source: MDPI journal article supplement (doi:10.3390/ijms25010618), 2024-01-03

**A**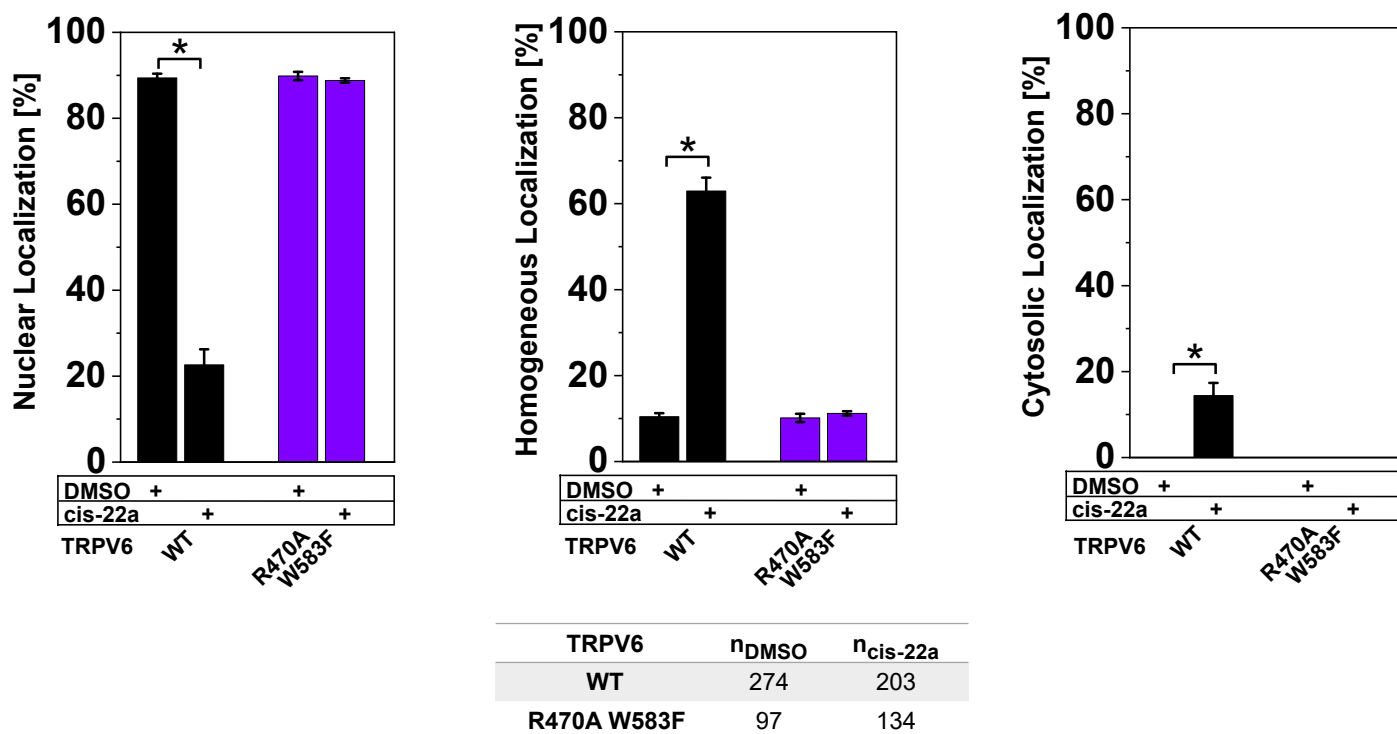**B**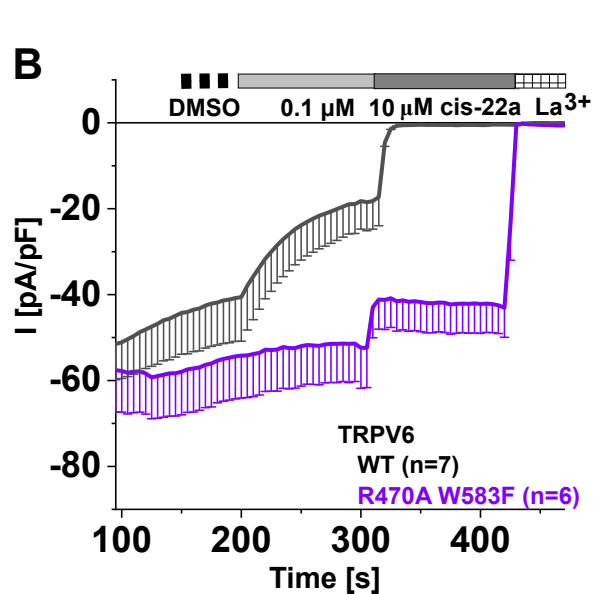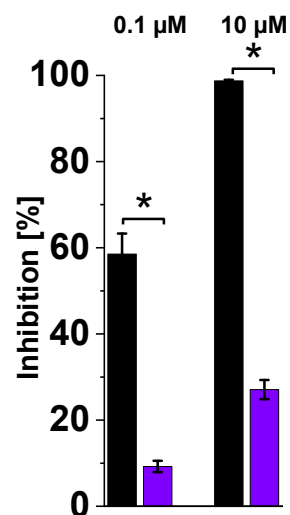**C**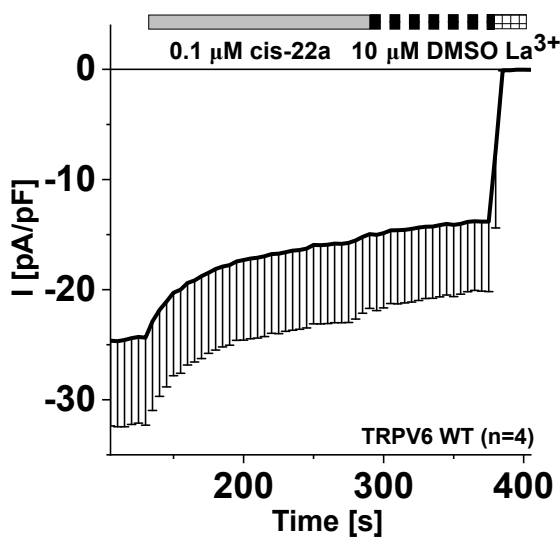**D**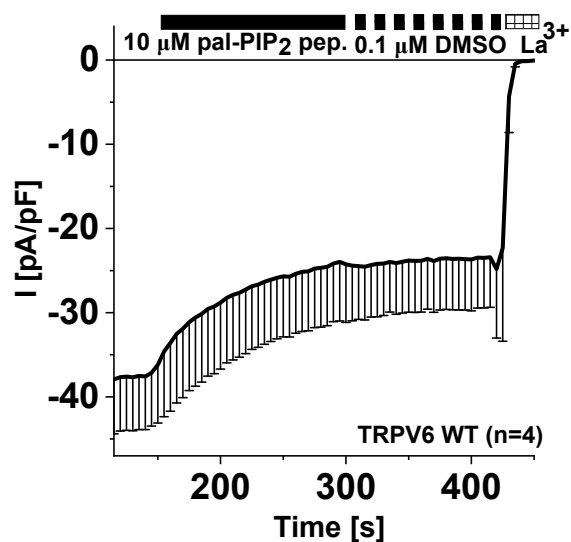

Supplement: s1 [file s1]

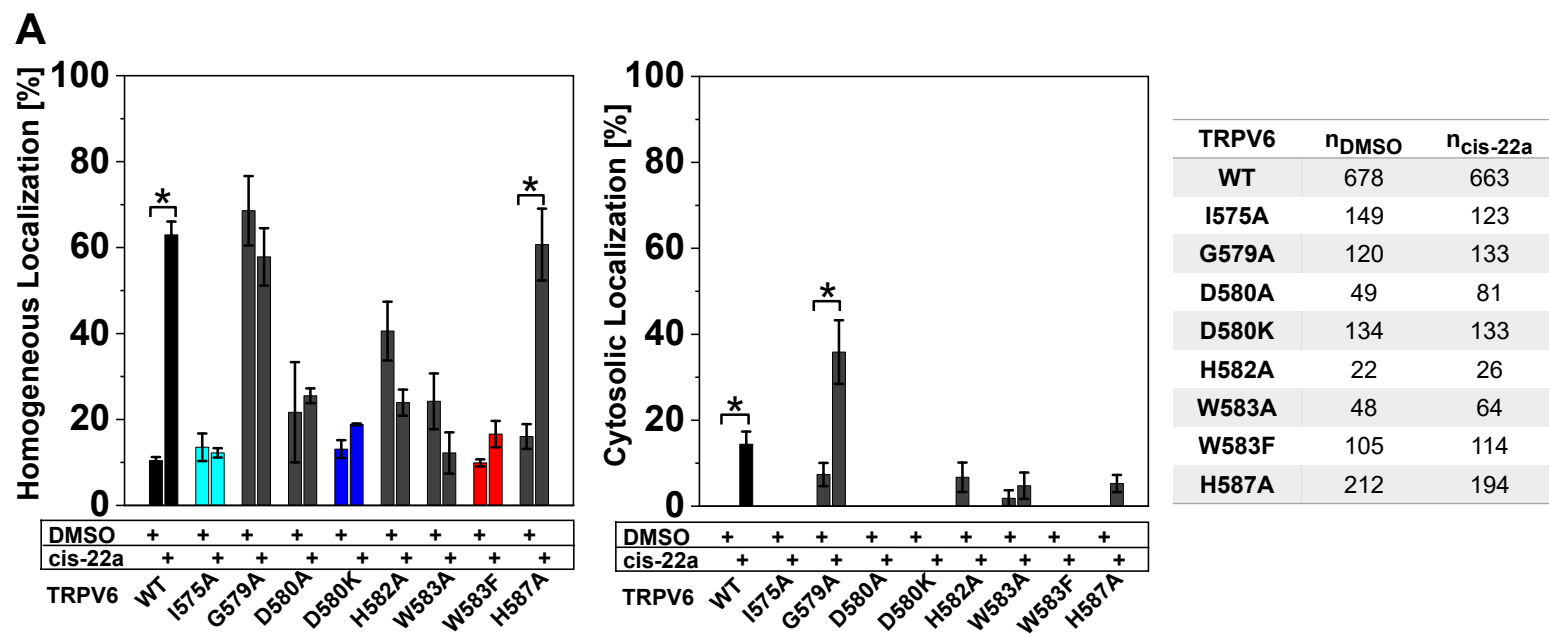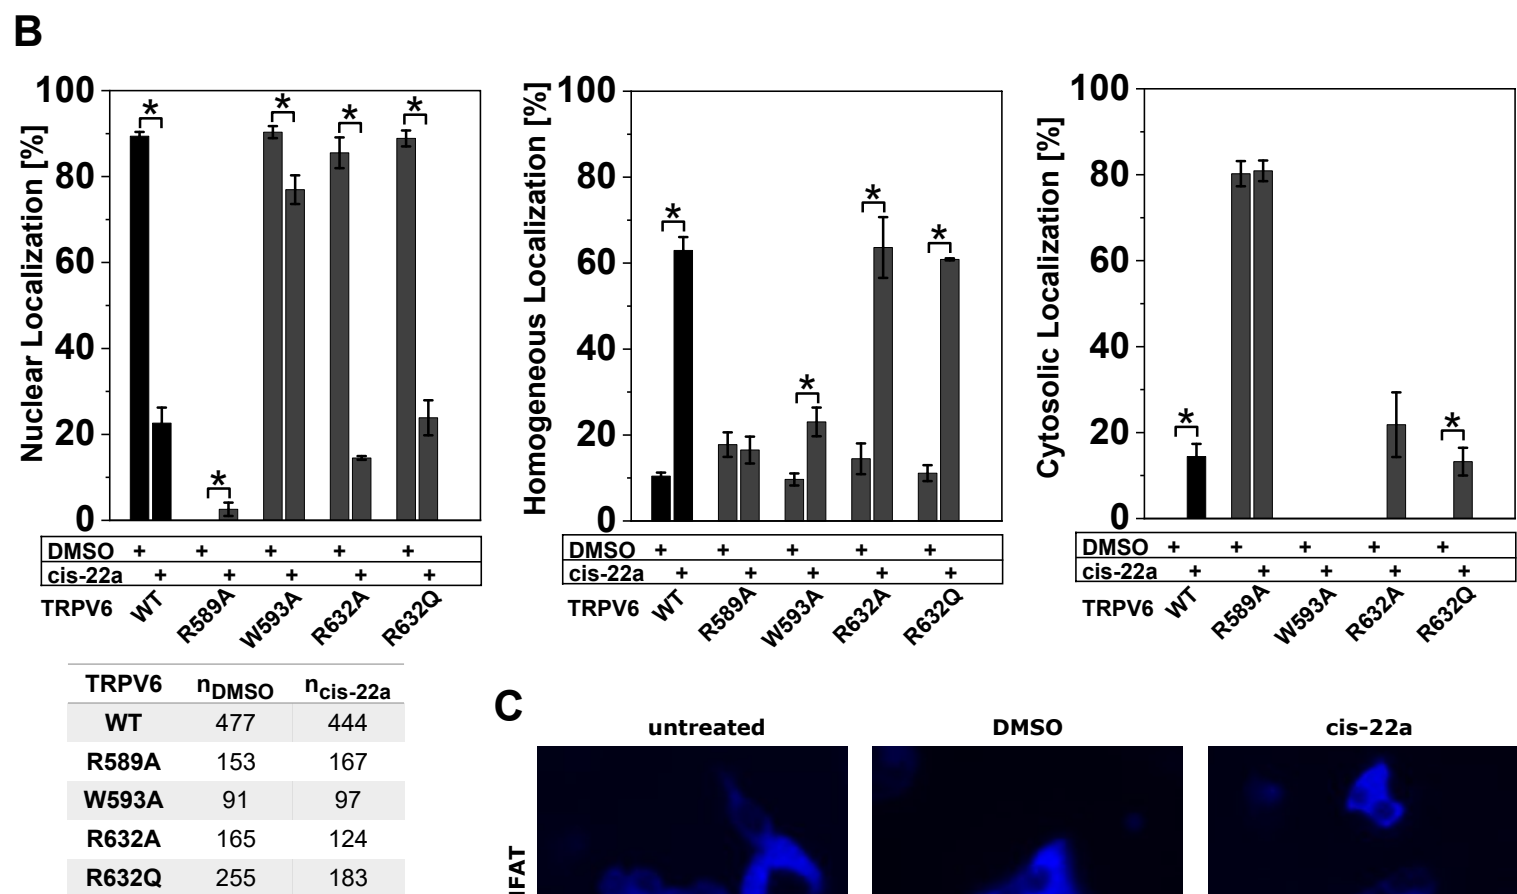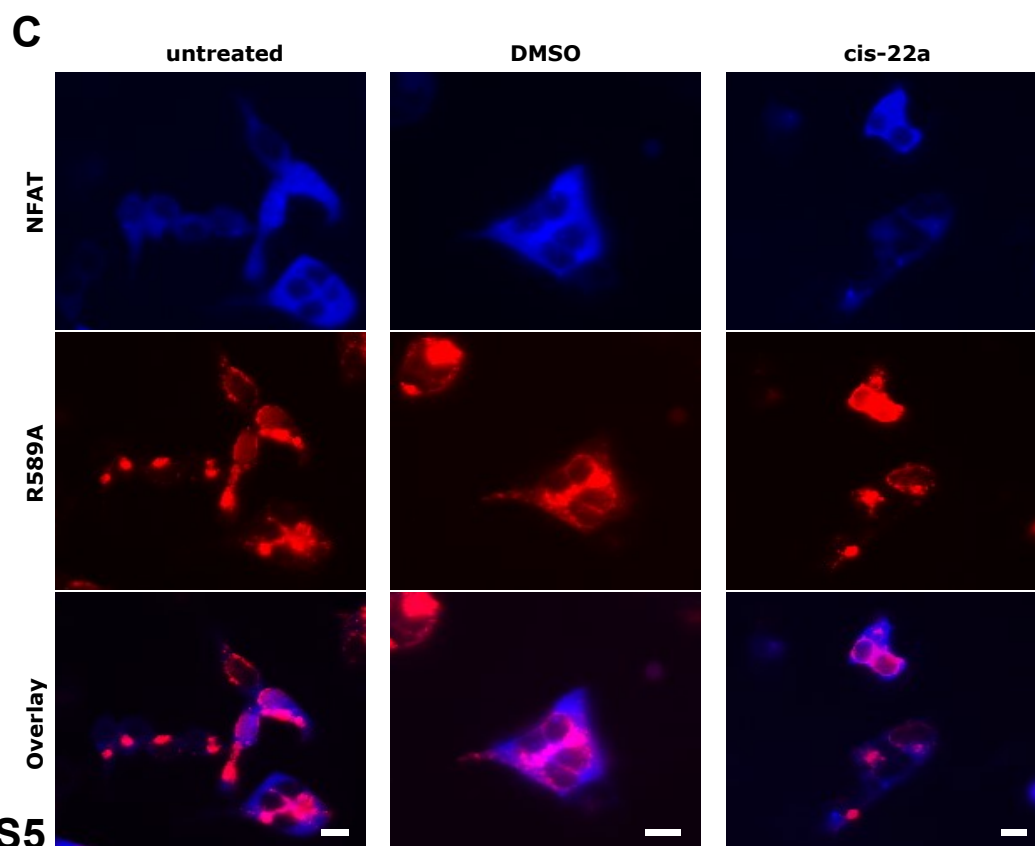

Supplementary Figure S5

Supplement: s1 [file s1]

**A**

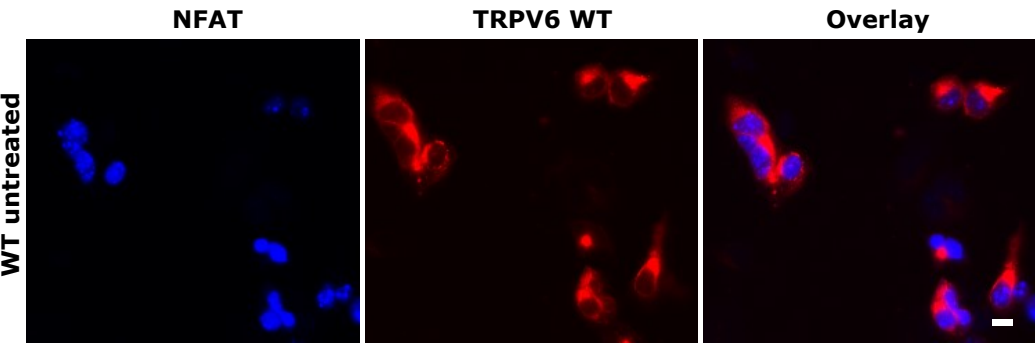

**B**

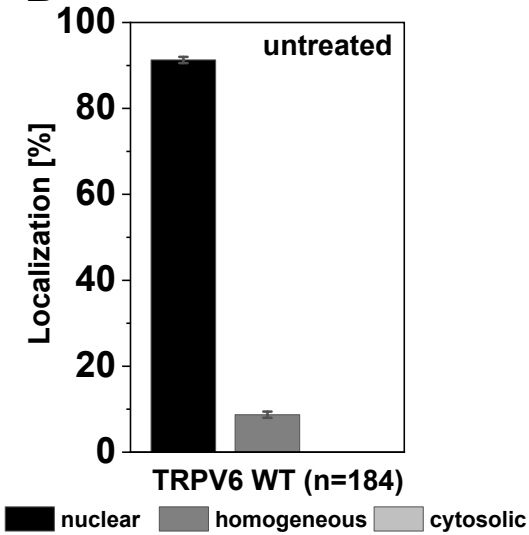

**C**

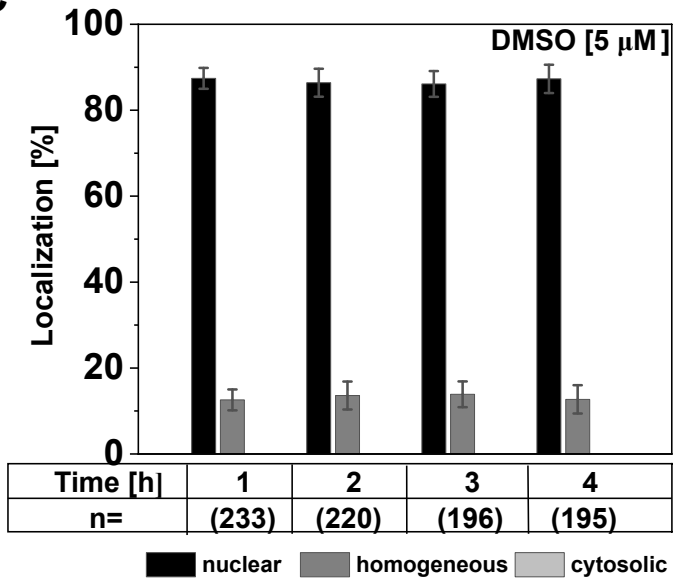

**D**

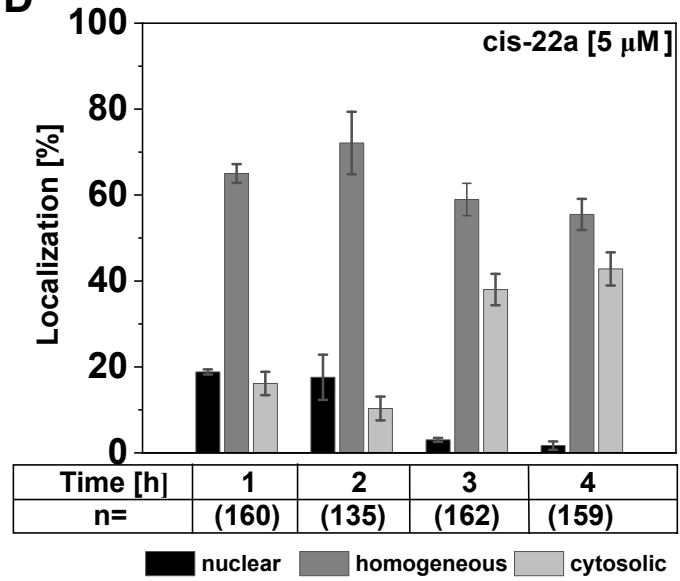

**E**

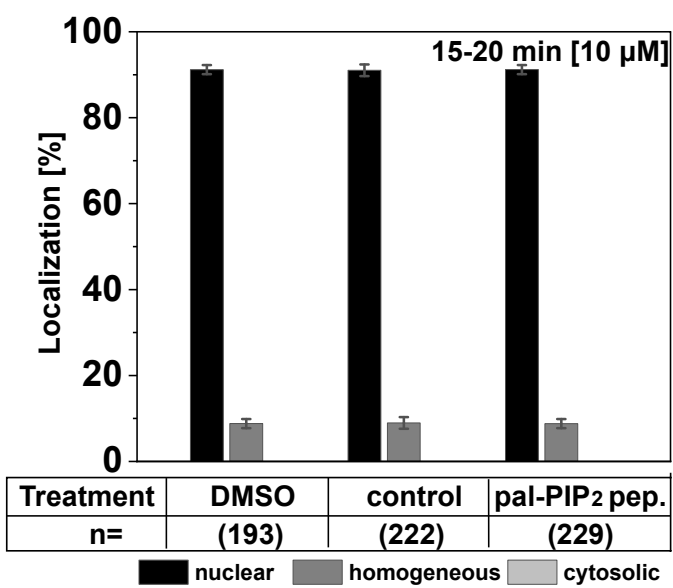

**F**

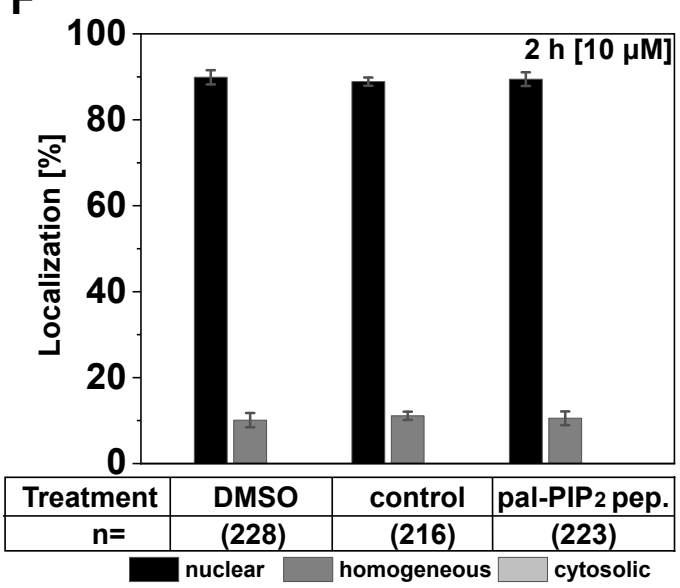

Supplement: s1 [file s1]

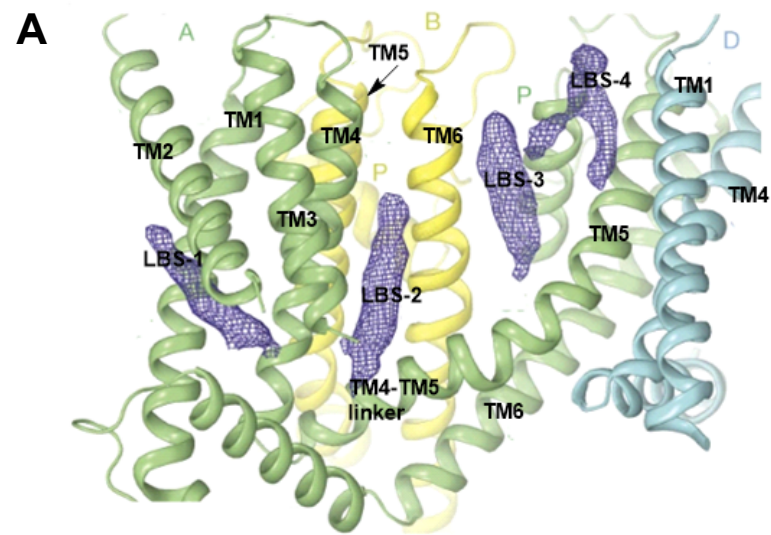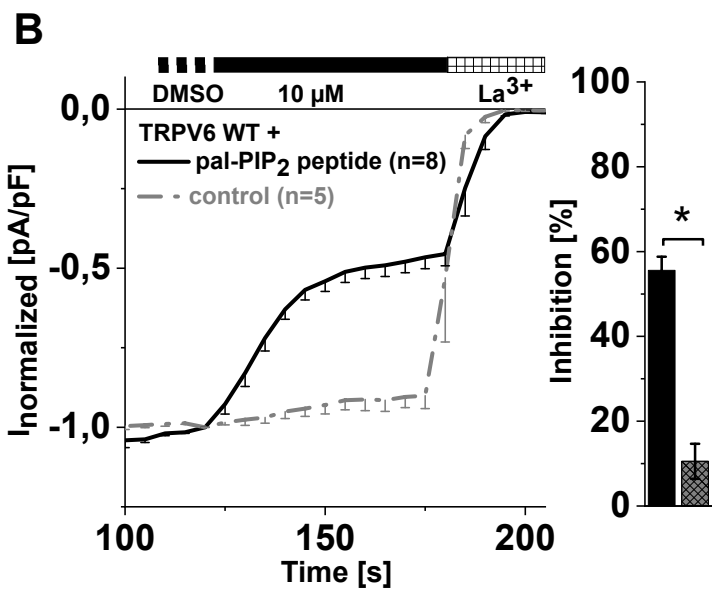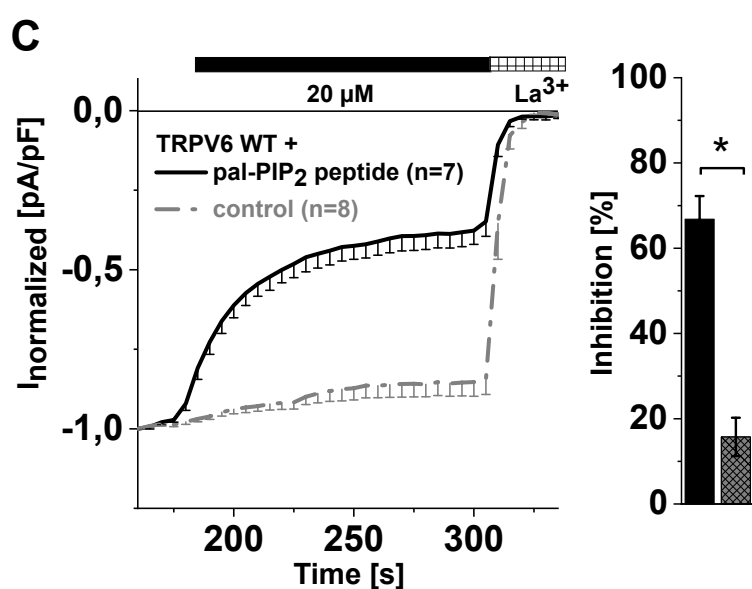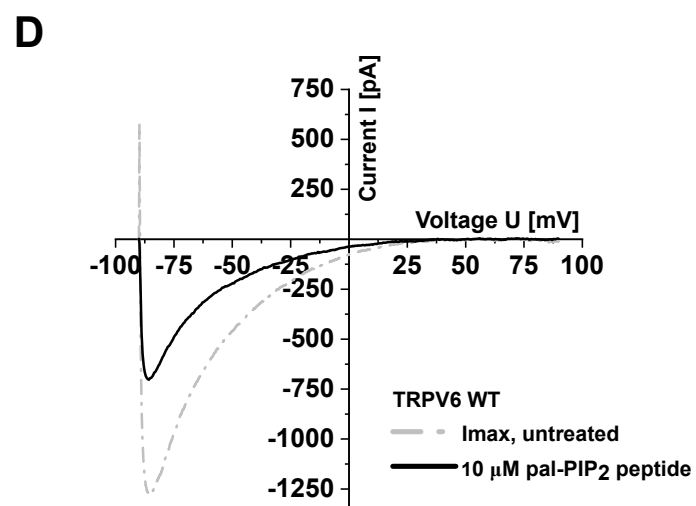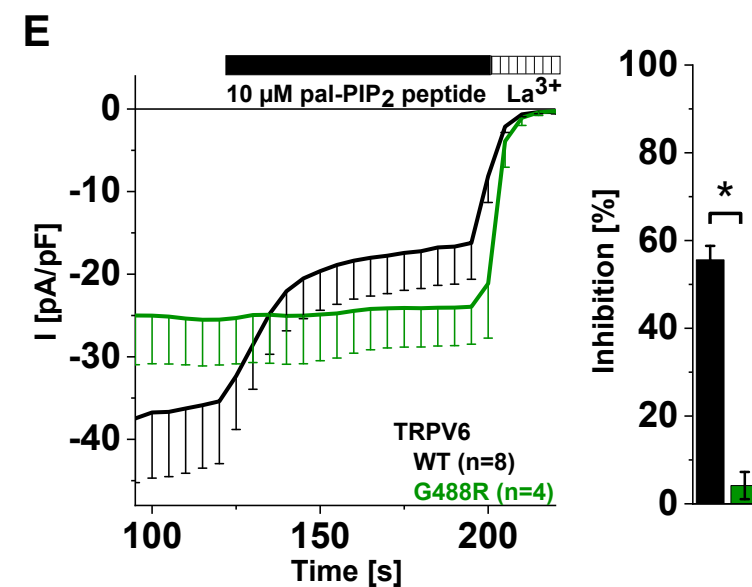

Supplementary Figure S1

Supplement: s1 [file s1]

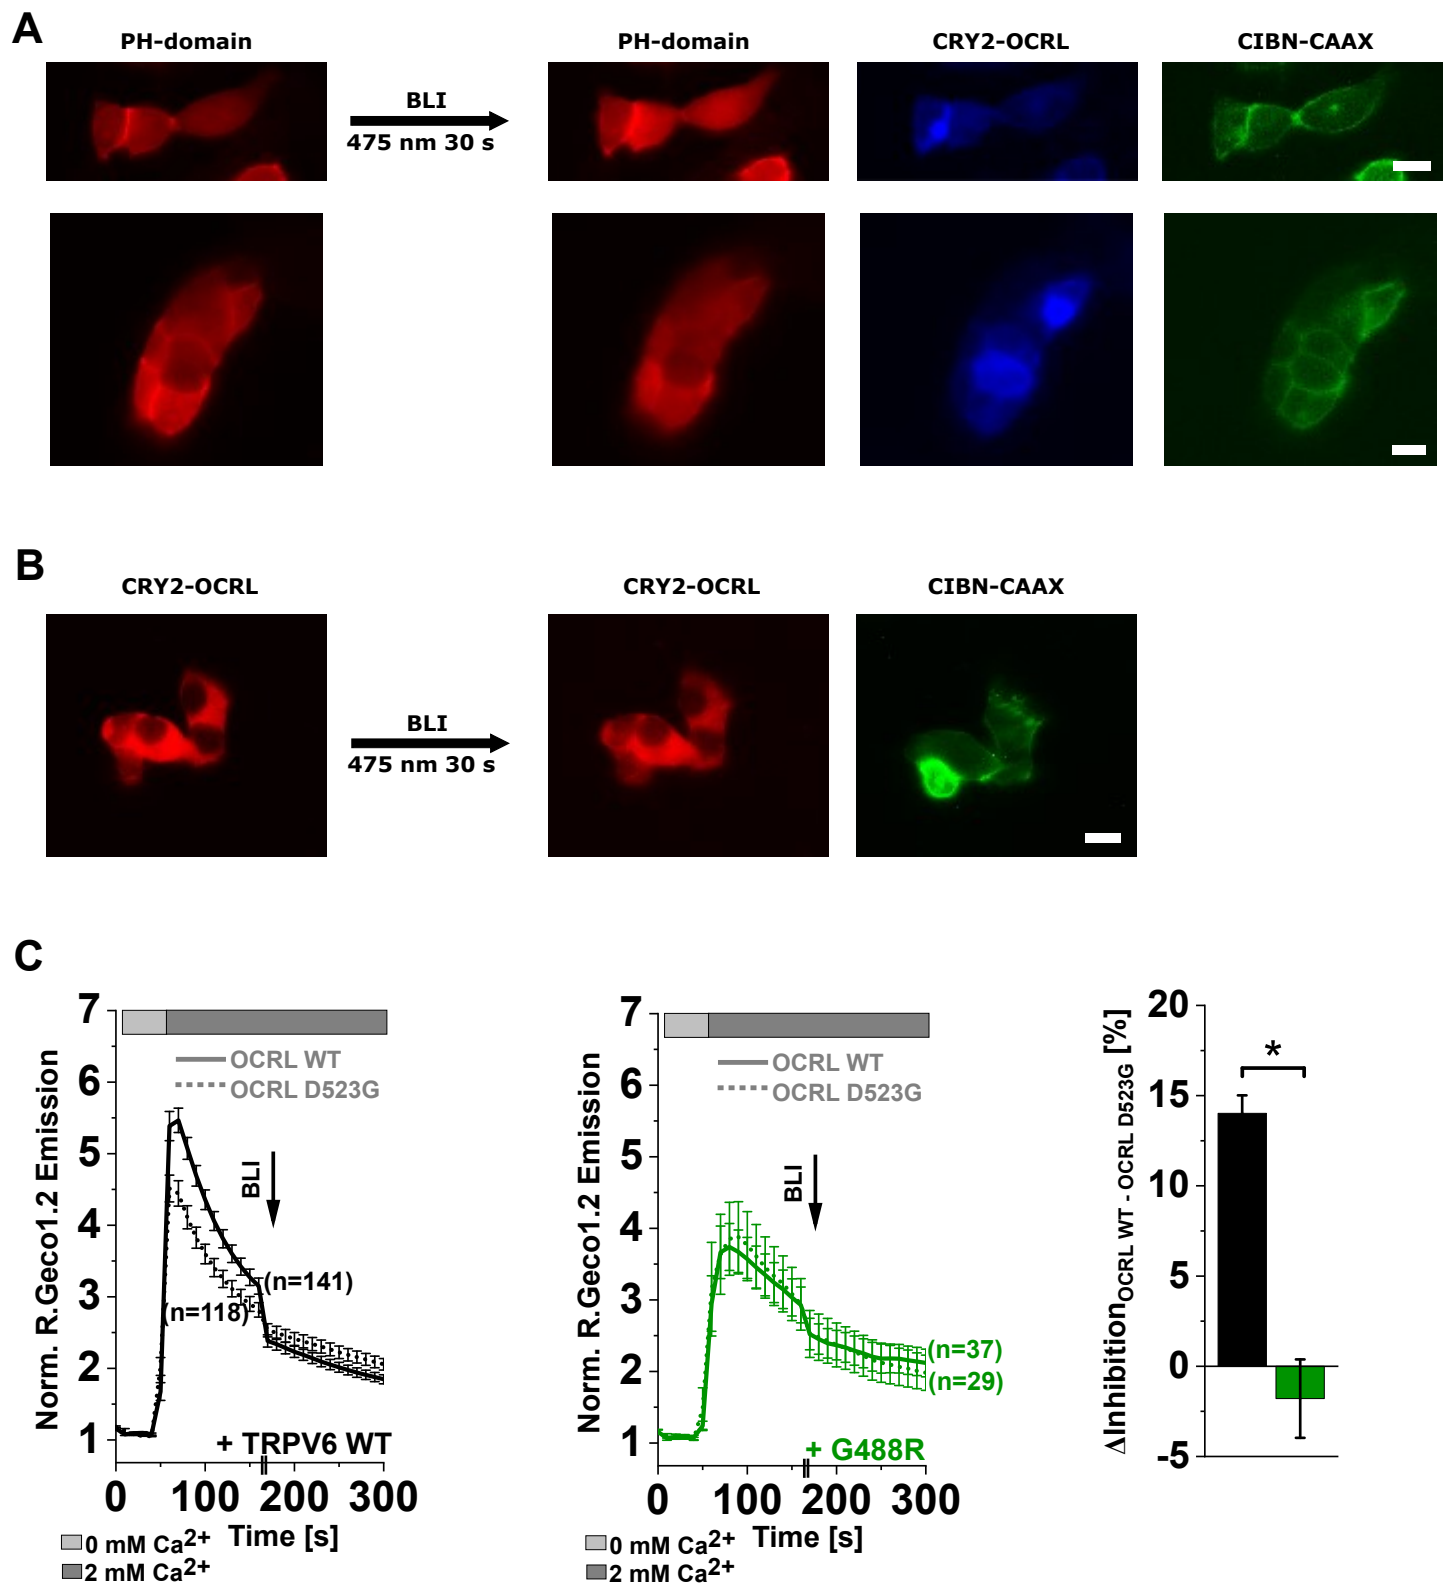

Supplementary Figure S4

Supplement: s1 [file s1]

A

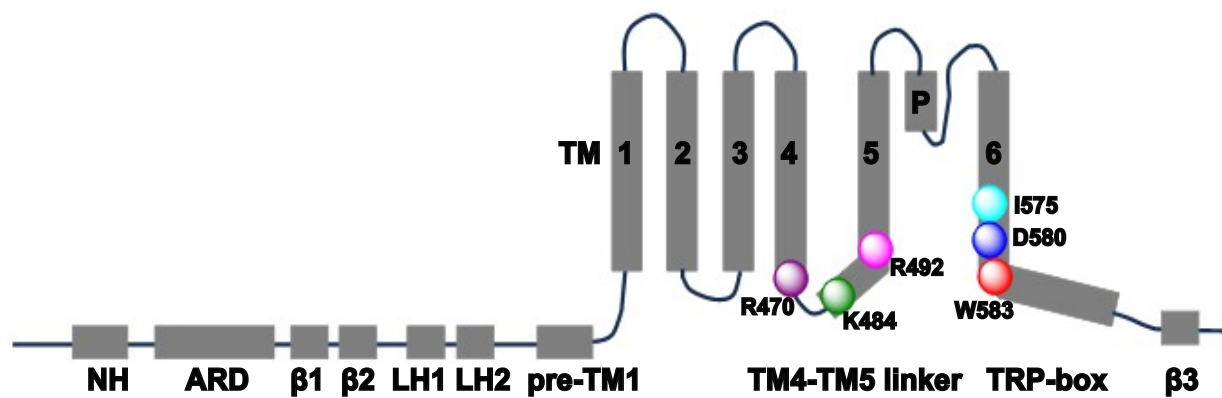

B

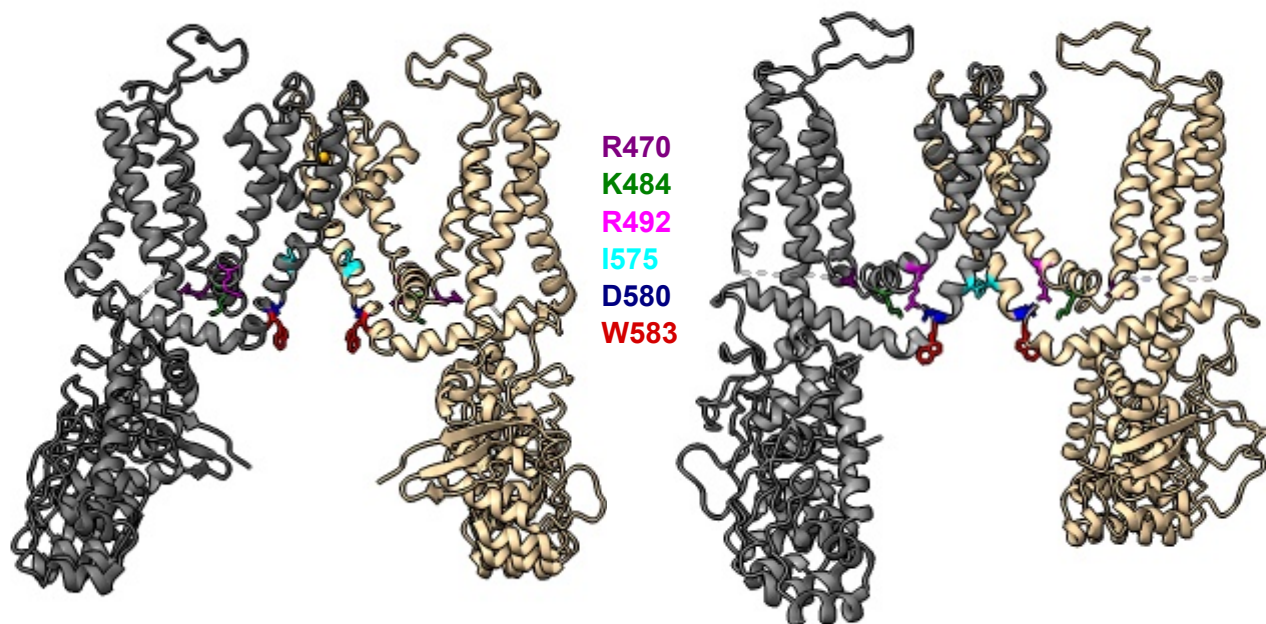

C

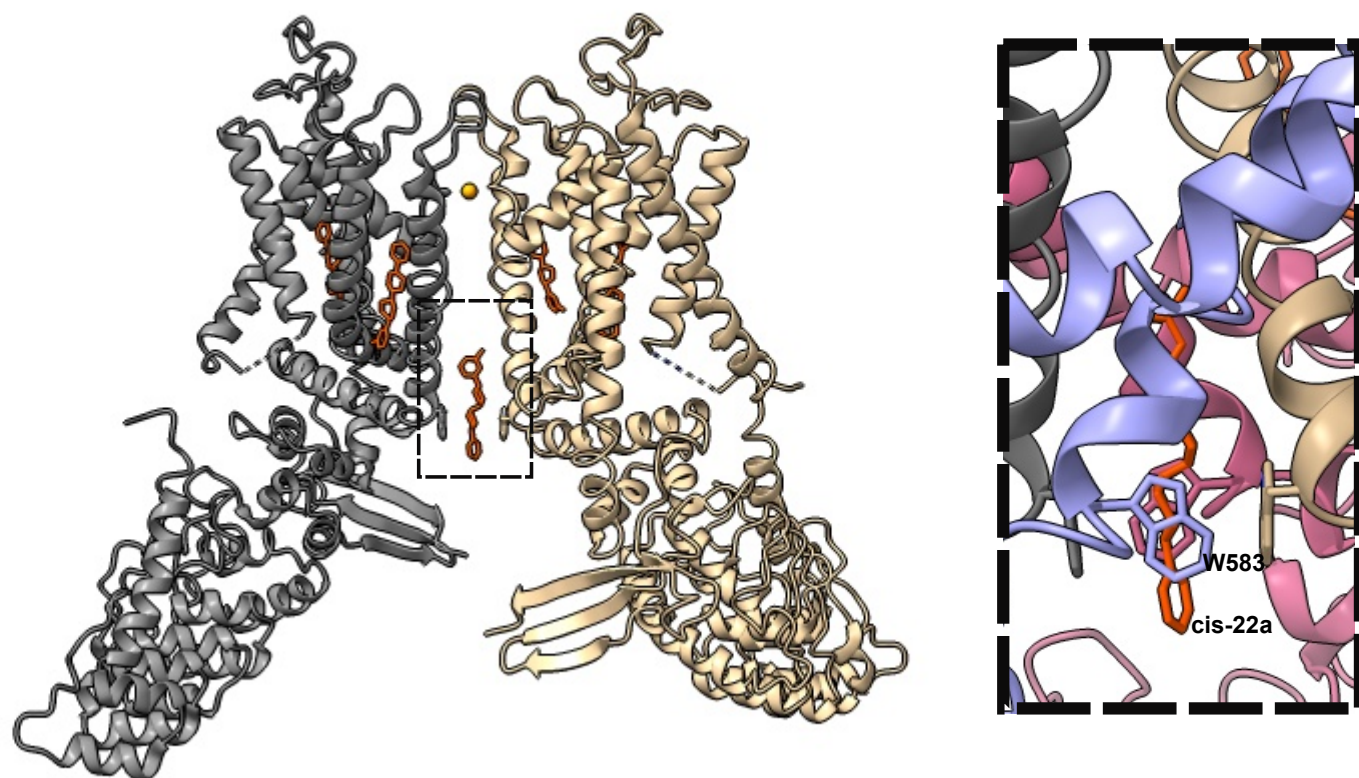

Supplementary Figure S7

Supplement: s1 [file s1]
